# Supplementary material for: A near-infrared BODIPY-based fluorescent probe for the detection of hydrogen sulfide in fetal bovine serum and living cells
Source: Royal Society of Chemistry journal article supplement (doi:10.1039/c6ra06952e), 2016-01-01
Supplement: c6ra06952e1.pdf [file c6ra06952e1.pdf]

# **A near-infrared BODIPY-based fluorescent probe for the detection of hydrogen sulfide in fetal bovine serum and living cells**

Jian Zhang,<sup>‡a</sup> Junliang Zhou,<sup>‡b</sup> Xiaochun Dong,<sup>\*a</sup> Xing Zheng,<sup>\*b</sup> and Weili Zhao<sup>\*a</sup>

*<sup>a</sup>School of Pharmacy, Fudan University, Shanghai, P. R. China. E-mail: zhaoweili@fudan.edu.cn*

*<sup>b</sup>Institute of Pharmacy and Pharmacology, University of South China, Hengyang, 421001, P. R. China. E-mail: zhengxing5018@yahoo.com*

|                                                                             |    |
|-----------------------------------------------------------------------------|----|
| 1. Additional Absorption and Emission Spectra                               | S2 |
| 2. MTT assays                                                               | S3 |
| 3. The plausible mechanism for selective reaction of <b>BDP-680</b> to NaSH | S3 |
| 4. Comparison of fluorescent probes for H <sub>2</sub> S                    | S4 |
| 5 Spectroscopic data                                                        | S6 |
| 6 X-ray crystal structure determinations of compound <b>BDP-680</b>         | S8 |
| 7 References                                                                | S9 |

## 1. Additional Absorption and Emission Spectra

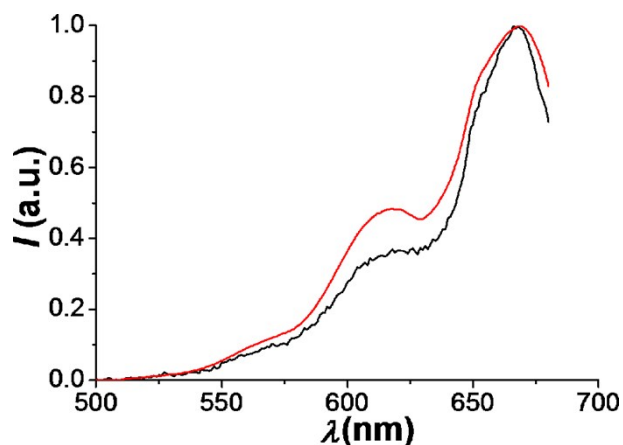

Figure S1 Normalized excitation spectra ( $\lambda_{\text{em}} = 683$  nm) of **BDP-680** (10  $\mu\text{M}$ ) prior to (black curve) and after (red curve) addition of NaSH (500  $\mu\text{M}$ ) for 0.5 h in MeCN/H<sub>2</sub>O (8/2, v/v; pH = 7.2) at 25 °C.

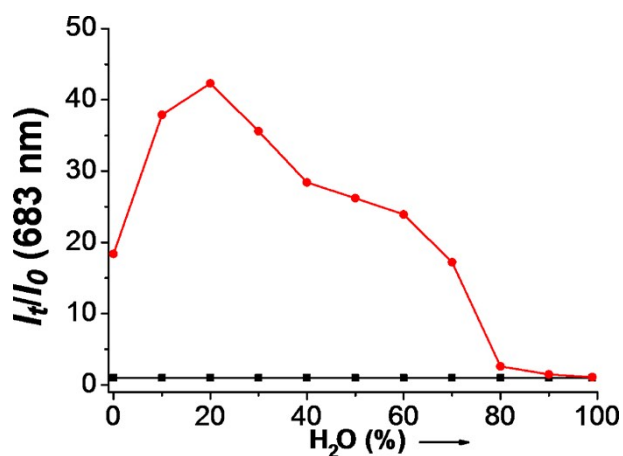

Figure S2 The effect of water content on the relative fluorescence intensity of **BDP-680** (10  $\mu\text{M}$ ) upon addition of 500  $\mu\text{M}$  NaSH in MeCN/H<sub>2</sub>O. All the data was measured at 683 nm ( $\lambda_{\text{ex}} = 610$  nm) at 25 °C 30 min after addition of NaSH (black square: **BDP-680**; red circle: **BDP-680** + NaSH).

## 2. MTT assays

MTT experiment was performed in 96-well plate to assess the cytotoxicity of the probe. The MTT assays in Human Hepatoma SMMC-7721 cells with probe concentrations from 2.5 to 80  $\mu\text{M}$  in comparison with the blank and negative control. Cells were plated on cell plates at  $4 \times 10^3$  cells per well and allowed to incubate for 24 hr. The **BDP-680** in various concentrations was added to the well and incubated for 24 hr followed by classical MTT treatment and data acquiring.

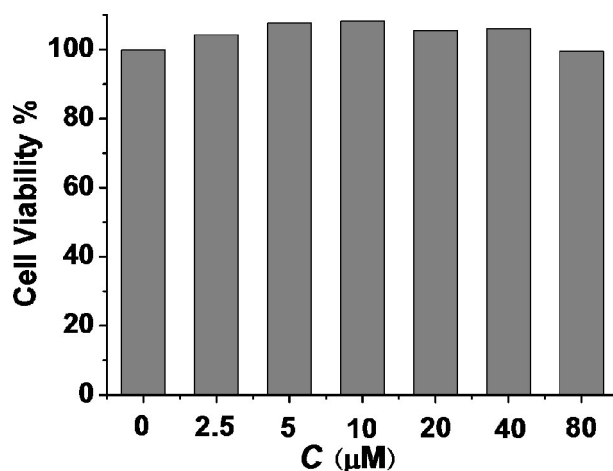

**Figure S3.** Cell viability assay of **BDP-680** in 7721 Cell, all compounds were incubated with the cells for 24 hr, and the cell viability was observed via MTT assays.

## 3. The plausible mechanism for selective reaction of BDP-680 to NaSH

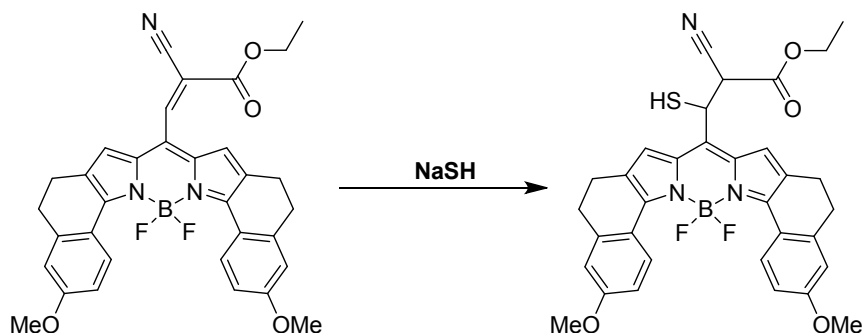

Scheme S1 The plausible mechanism for selective reaction of **BDP-680** to  $\text{NaSH}$

**4. Table S1. Comparison of fluorescent probes for H<sub>2</sub>S.**

| Probes                                                                              | $\lambda_{\text{ex}}/\lambda_{\text{em}}$<br>[nm] | Linear<br>response<br>range | Detection<br>limit | Ref. |
|-------------------------------------------------------------------------------------|---------------------------------------------------|-----------------------------|--------------------|------|
| 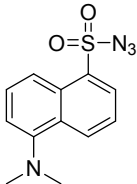   | 340/535                                           | 1–100 $\mu\text{M}$         | 1 $\mu\text{M}$    | 23   |
| 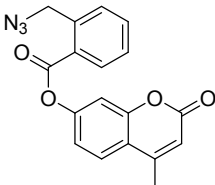   | 365/450                                           | —                           | 10 $\mu\text{M}$   | 25   |
| 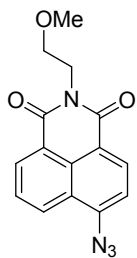  | 435/545                                           | —                           | 1–5 $\mu\text{M}$  | 26   |
| 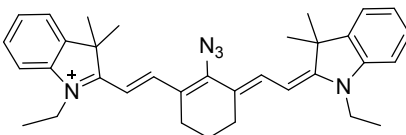 | 625/710                                           | 1–100 $\mu\text{M}$         | 0.08 $\mu\text{M}$ | 27   |
| 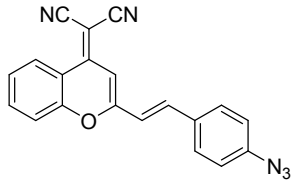 | 520/670                                           | 25–250 $\mu\text{M}$        | 3.05 $\mu\text{M}$ | 28   |
| 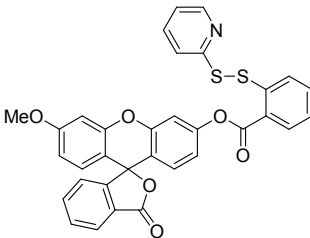 | 465/—                                             | 0–10 $\mu\text{M}$          | —                  | 32   |
| 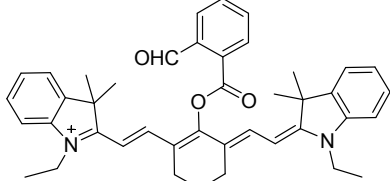 | 700/780                                           | 0–70 $\mu\text{M}$          | 5.0–10 nM          | 34   |

|                                                                                     |         |                     |                    |           |
|-------------------------------------------------------------------------------------|---------|---------------------|--------------------|-----------|
| 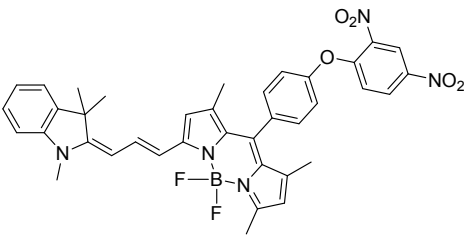   | 650/780 | 0–10 $\mu\text{M}$  | 0.05 $\mu\text{M}$ | 38        |
| 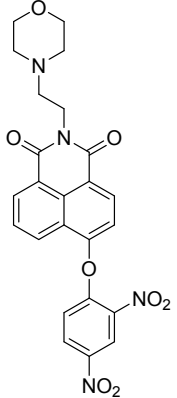   | 450/555 | 0–100 $\mu\text{M}$ | 0.48 $\mu\text{M}$ | 39        |
| 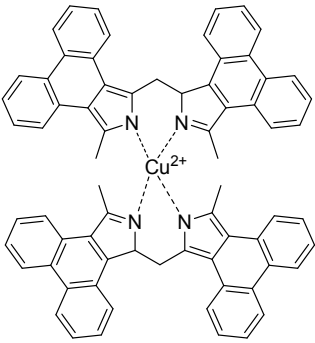  | —/600   | —                   | 1 $\mu\text{M}$    | 42        |
| 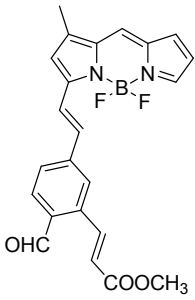 | 520/561 | 0–350 $\mu\text{M}$ | 2.5 $\mu\text{M}$  | 45        |
| 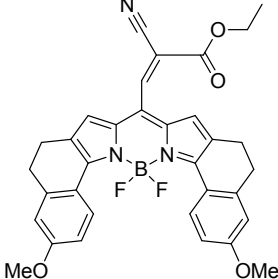 | 610/683 | 0–100 $\mu\text{M}$ | 0.5 $\mu\text{M}$  | This work |

## 5. Spectroscopic data

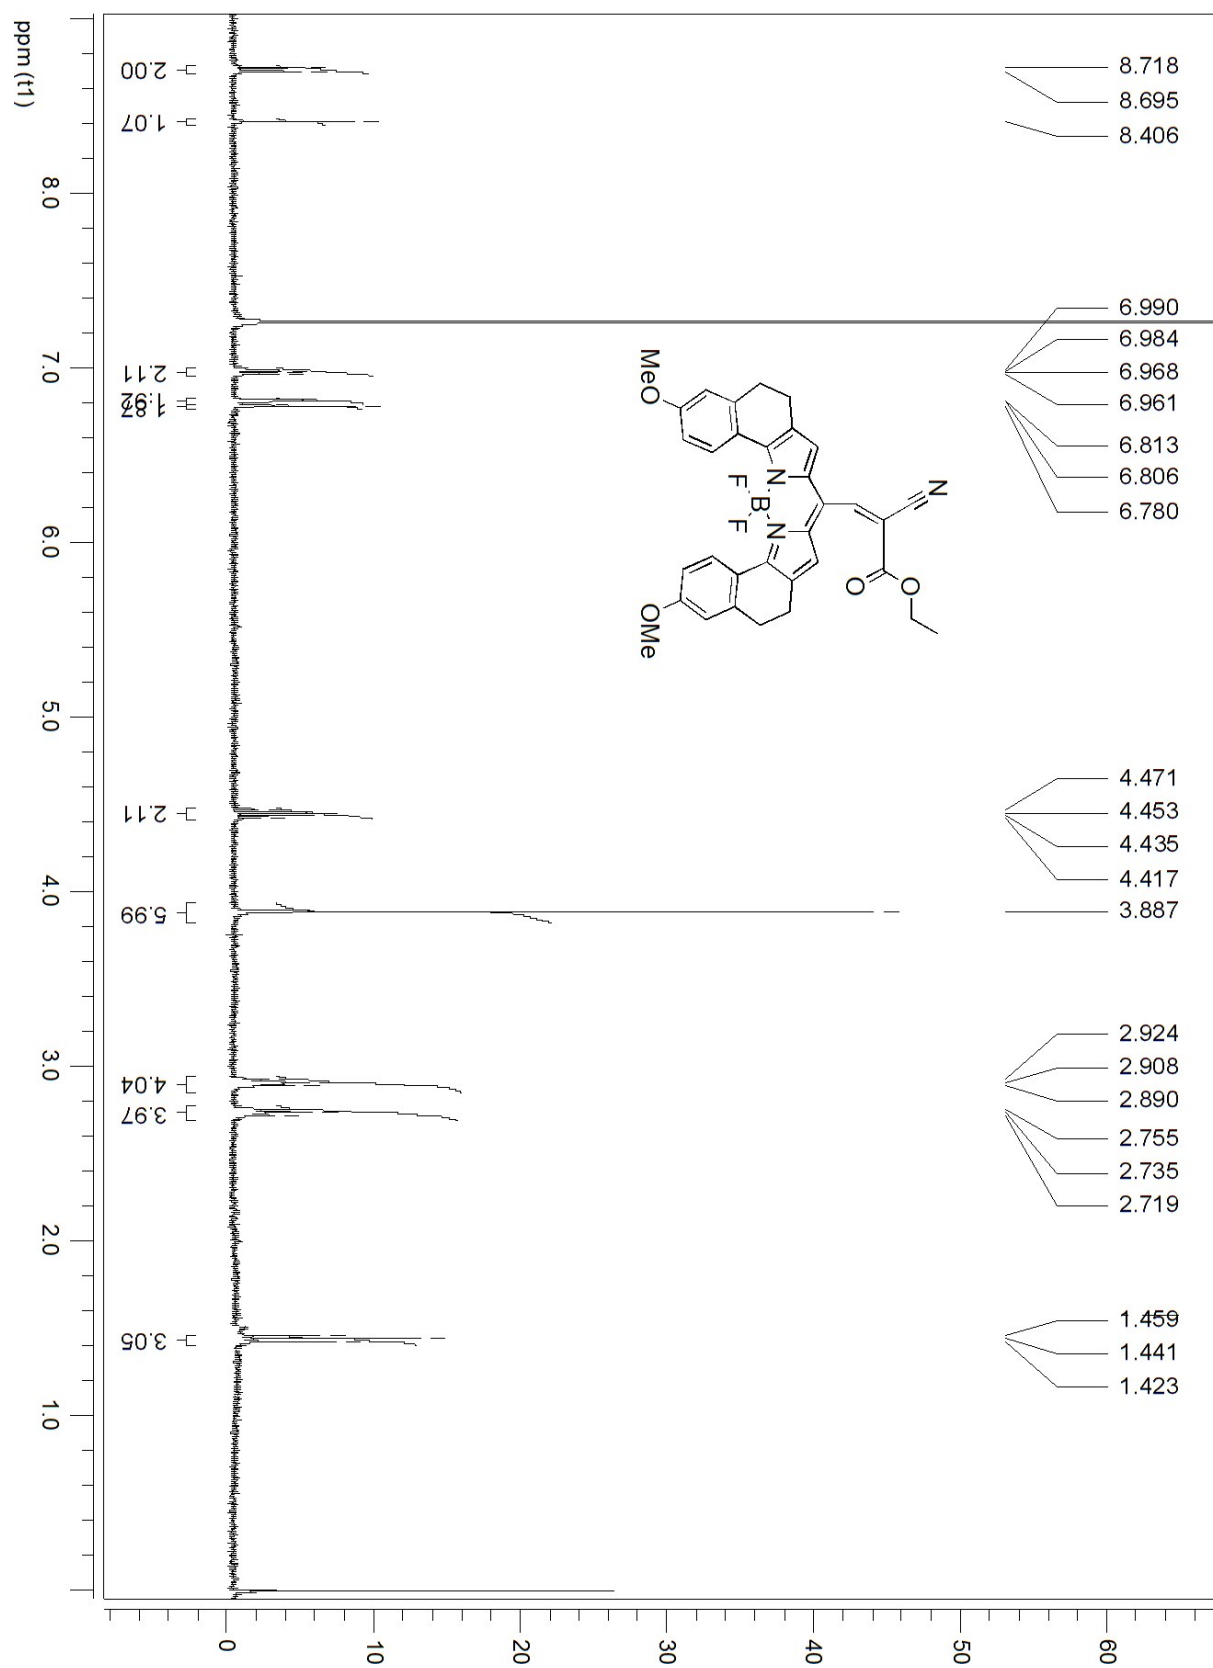

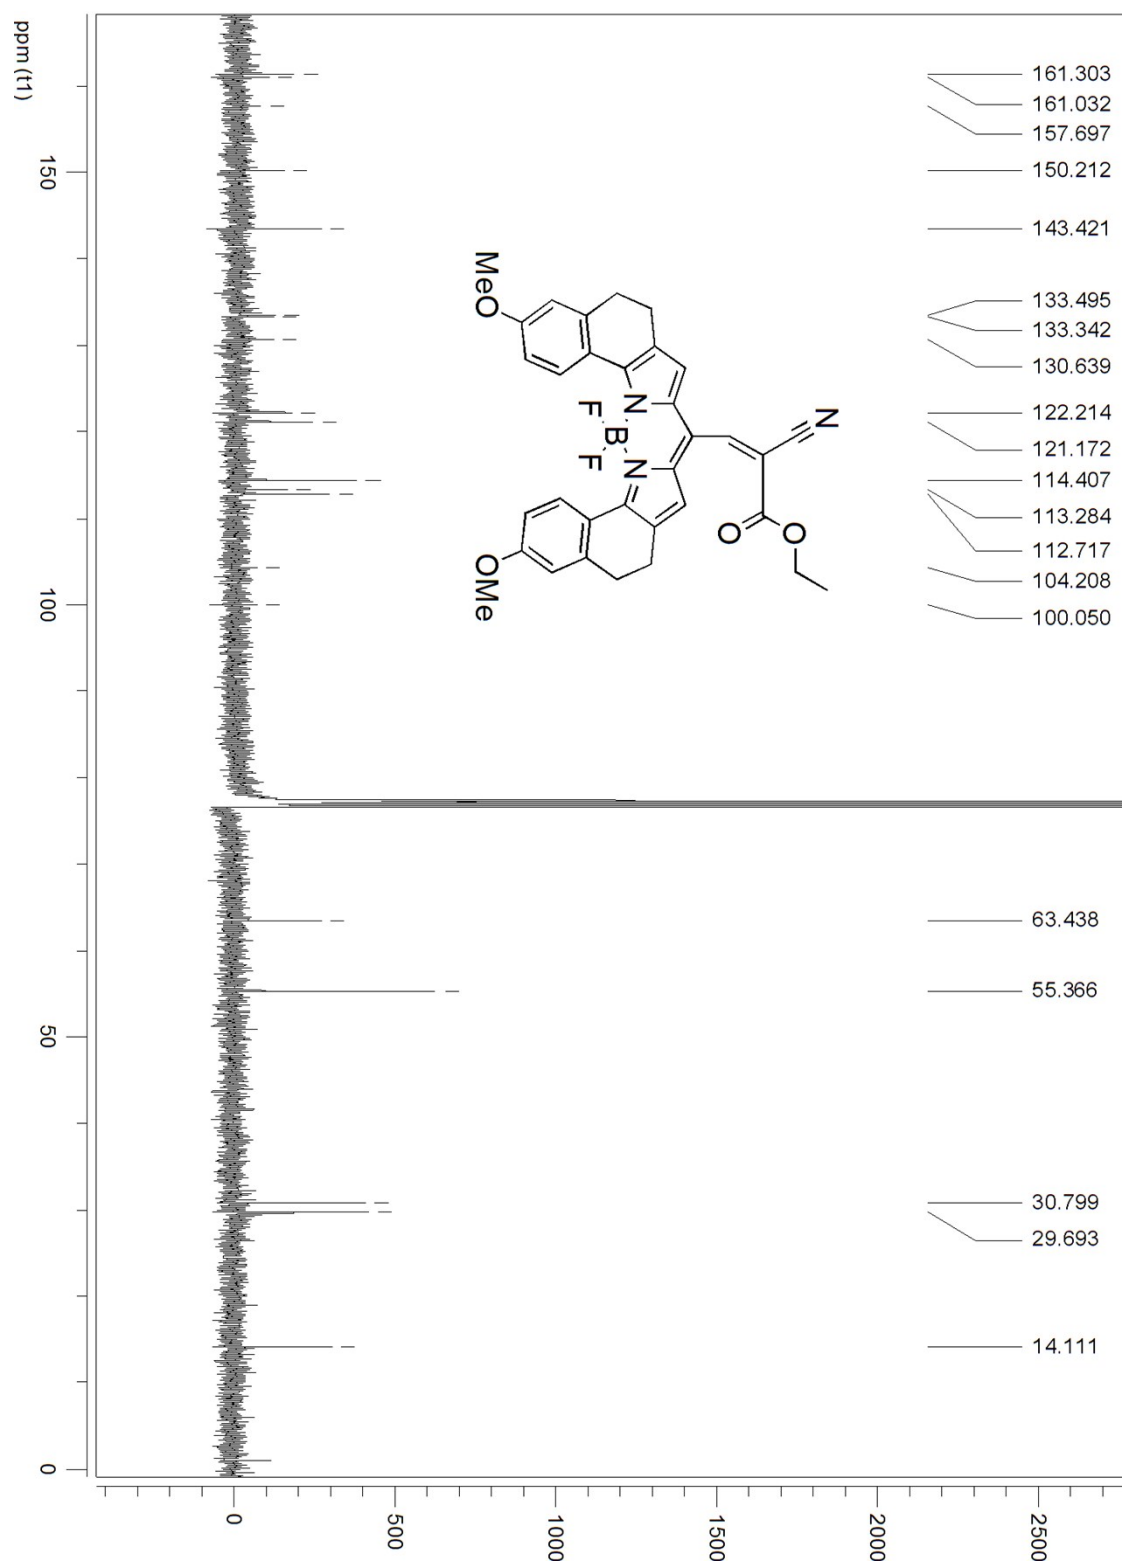

## 6. X-ray crystal structure determinations of BDP-680

Crystals suitable for the X-ray structural determination were mounted on a Mac Science DIP2030 imaging plate diffractometer and irradiated with graphite monochromated Mo- $K\alpha$  radiation ( $\lambda = 0.71073 \text{ \AA}$ ) for the data collection. The unit cell parameters were determined by separately autoindexing several images in each data set using the DENZO program (MAC Science).<sup>1</sup> For each data set, the rotation images were collected in  $3^\circ$  increments with a total rotation of  $180^\circ$  about the  $\phi$  axis. The data were processed using SCALEPACK. The structures were solved by a direct method with the SHELX-97 program.<sup>2</sup> Refinement on  $F^2$  was carried out using the full-matrix least-squares by the SHELX-97 program.<sup>2</sup> All non-hydrogen atoms were refined using the anisotropic thermal parameters. The hydrogen atoms were included in the refinement along with the isotropic thermal parameters.

Crystal data for **BDP-680**.  $\text{C}_{33}\text{H}_{28}\text{BF}_2\text{N}_3\text{O}_4$ ,  $M = 579.40$ , triclinic,  $a = 8.0202(2)$ ,  $b = 14.3300(2)$ ,  $c = 16.5784(3) \text{ \AA}$ ,  $\alpha = 112.088(1)$ ,  $\beta = 101.887(2)$ ,  $\gamma = 90.329(3)^\circ$ ,  $V = 1720.36(6) \text{ \AA}^3$ ,  $T = 296(2) \text{ K}$ , space group  $P-1$ ,  $Z = 2$ ,  $F(000) = 728$ ,  $D_{\text{calc}} = 1.352 \text{ g cm}^{-3}$ ,  $\mu = 0.25 \text{ mm}^{-1}$ ,  $R_{\text{int}} = 0.022$ ,  $R_1 = 0.080$  ( $I > 2\sigma(I)$ ),  $wR_2$  (all data) = 0.228,  $GOF = 1.17$ . CCDC reference number 1023076 for **BDP-680**.

CCDC reference number 1023076 for **BDP-680** contains the supplementary crystallographic data. These data can be obtained free of charge via [www.ccdc.cam.ac.uk/conts/retrieving.html](http://www.ccdc.cam.ac.uk/conts/retrieving.html) (or from the Cambridge Crystallographic Data Centre, 12 Union Road, Cambridge CB2 1EZ, UK; fax: (+44) 1223-336033; or [deposit@ccdc.cam.ac.uk](mailto:deposit@ccdc.cam.ac.uk)).

## 7. References

- 1 Z. Otwinowski and W. Minor, *Methods Enzymol.* 1997, **276**, 307.
- 2 G. M. Sheldrick, *SHELX-97*, University of Göttingen, Göttingen, Germany, 1997.
